# Supplementary material for: Breaking Barriers: Access to Services among People Living with HIV/AIDS (PLHIV) in Jharkhand – A convergent Mixed Methods Study
Source: Research Square preprint supplement (doi:10.21203/rs.3.rs-7107900/v1), 2025-08-06
Supplement: Supplementary file [file b7c040fd6f42c7df37ec668c.pdf]

## Questionnaire

### **I. Sociodemographic profile**

| <b>S. No.</b> | <b>Variable</b>                                                                                                 | <b>Response</b>  |
|---------------|-----------------------------------------------------------------------------------------------------------------|------------------|
| 1             | Patient Number                                                                                                  |                  |
| 2             | Age<br>a) Less than/equal to 30 years (18 – 30 years)<br>b) 31 – 60 years<br>c) More than 60 years              |                  |
| 3             | Gender<br>a) Male<br>b) Female<br>c) Transgender                                                                |                  |
| 4             | Residence<br>a) Rural<br>b) Urban                                                                               |                  |
| 5             | District of Residence                                                                                           |                  |
| 6             | Education<br>a) Illiterate<br>b) Upto Primary (upto class 5)<br>c) Above primary                                |                  |
| 7             | Occupation<br>a) Unemployed<br>b) Service class<br>c) Daily wage worker<br>d) Home maker<br>e) Others (Specify) |                  |
| 8             | Marital status<br>a) Married<br>b) Unmarried<br>c) Others (Specify)                                             |                  |
| 9             | Total Annual Income of the family                                                                               |                  |
| 10            | Social Class of the family                                                                                      | a) BPL<br>b) APL |

## II. Perceived barriers to HIV Care

| S. No. | Variable                                                                                                                                                                   | Response                                                              |
|--------|----------------------------------------------------------------------------------------------------------------------------------------------------------------------------|-----------------------------------------------------------------------|
| 1      | Do you visit ART Centre regularly<br>a) YES<br>b) NO                                                                                                                       |                                                                       |
| 2      | How frequently do you visit the ART centre<br>a) Once a month<br>b) Once in 2 months<br>c) Ill-defined frequency                                                           |                                                                       |
| 3      | <b>Community related barriers</b> towards HIV care services, please tick the most appropriate response for each of the following:<br>a) Fear of being recognized           | <ul style="list-style-type: none"> <li>▪ YES</li> <li>▪ NO</li> </ul> |
|        | b) Stigma and discrimination towards PLHIV                                                                                                                                 | <ul style="list-style-type: none"> <li>▪ YES</li> <li>▪ NO</li> </ul> |
| 4      | <b>Health system related barriers</b> towards HIV care services, please tick the most appropriate response for each of the following:<br>a) Lack of trust in health system | <ul style="list-style-type: none"> <li>▪ YES</li> <li>▪ NO</li> </ul> |
|        | b) Belief that there is No cure                                                                                                                                            | <ul style="list-style-type: none"> <li>▪ YES</li> <li>▪ NO</li> </ul> |
|        | c) Stock out of drugs                                                                                                                                                      | <ul style="list-style-type: none"> <li>▪ YES</li> <li>▪ NO</li> </ul> |
|        | d) Unsuitable working hour of service provider centre                                                                                                                      | <ul style="list-style-type: none"> <li>▪ YES</li> <li>▪ NO</li> </ul> |
|        | e) Long waiting hours at the centre                                                                                                                                        | <ul style="list-style-type: none"> <li>▪ YES</li> <li>▪ NO</li> </ul> |
|        | f) Don't want to be forced to take medicines                                                                                                                               | <ul style="list-style-type: none"> <li>▪ YES</li> <li>▪ NO</li> </ul> |
|        | g) Fear of side effects of drugs                                                                                                                                           | <ul style="list-style-type: none"> <li>▪ YES</li> <li>▪ NO</li> </ul> |

|   |                                                                                                                        |                                                                                                                                                 |
|---|------------------------------------------------------------------------------------------------------------------------|-------------------------------------------------------------------------------------------------------------------------------------------------|
|   | h) Satisfaction with the grievance redressal mechanism                                                                 | <ul style="list-style-type: none"> <li>▪ Fully Satisfied</li> <li>▪ Satisfied</li> <li>▪ Somewhat satisfied</li> <li>▪ Not Satisfied</li> </ul> |
|   | i) Interaction with the counsellor                                                                                     | <ul style="list-style-type: none"> <li>▪ Satisfactory</li> <li>▪ Un-satisfactory</li> </ul>                                                     |
|   | j) Any follow-up by the health worker                                                                                  | <ul style="list-style-type: none"> <li>▪ YES</li> <li>▪ NO</li> </ul>                                                                           |
| 5 | <b>Social barriers</b> towards HIV care services, please tick the most appropriate response for each of the following: |                                                                                                                                                 |
|   | a) Dependency on another person to accompany to ART Centre                                                             | <ul style="list-style-type: none"> <li>▪ YES</li> <li>▪ NO</li> </ul>                                                                           |
|   | b) Wage loss on the day of visit                                                                                       | <ul style="list-style-type: none"> <li>▪ YES</li> <li>▪ NO</li> </ul>                                                                           |
|   | c) If YES in the above Q 5(b), then how much                                                                           |                                                                                                                                                 |
|   | d) Lack of travel fare                                                                                                 | <ul style="list-style-type: none"> <li>▪ YES</li> <li>▪ NO</li> </ul>                                                                           |
|   | e) Distance and transportation problem                                                                                 | <ul style="list-style-type: none"> <li>▪ YES</li> <li>▪ NO</li> </ul>                                                                           |
| 6 | Any other perceived barrier to HIV care (If YES, Specify)                                                              |                                                                                                                                                 |
| 7 | Any suggestions for improvement of services at the ART centre                                                          |                                                                                                                                                 |

## **IDI Questions with Probes**

- 1) Mention the services being received by the PLHIV  
**Probes for discussion:**
  - a. Diagnostic services
  - b. Testing services
  - c. Counselling services
  
- 2) Challenges being faced for service access  
**Probes for discussion:**
  - a. Health system related challenges
  - b. Community related challenges
  - c. Socio-economic challenges
  
- 3) Knowledge about the process of getting registered for ART  
**Probes for discussion:**
  - a. Accompanied by any health worker
  - b. Knowledge about TB/HIV Co-infection
  - c. Knowledge about 2<sup>nd</sup> line ART/ART Plus
  
- 4) Brief about some schemes related to PLHIV  
**Probes for discussion:**
  - a. Food security
  - b. Economic help (Pension Scheme)
  - c. Any other related scheme
  
- 5) Discrimination faced after being diagnosed with HIV/AIDS  
**Probes for discussion:**
  - a. Social discrimination
  - b. Community outcast
  - c. Family outcast
